# Alcohol Consumption and Dietary Patterns: The FinDrink Study

Timothy O. Fawehinmi<sup>1\*</sup>, Jenni Ilomäki<sup>2</sup>, Sari Voutilainen<sup>1</sup>, Jussi Kauhanen<sup>1</sup>

**1** Institute of Public Health and Clinical Nutrition, University of Eastern Finland, Kuopio, Finland, **2** School of Pharmacy and Medical Sciences, Quality Use of Medicines and Pharmacy Research Centre, Sansom Institute, University of South Australia, Adelaide, Australia

## Abstract

The aim of this population-based study was to investigate differences in dietary patterns in relation to the level of alcohol consumption among Finnish adults. This study was part of the FinDrink project, an epidemiologic study on alcohol use among Finnish population. It utilized data from the Kuopio Ischaemic Heart Disease Risk Factor Study. A total of 1720 subjects comprising of 816 men and 904 women aged 53–73 years were included in the study in 1998–2001. Food intake was collected via a 4-day food diary method. Self-reported alcohol consumption was assessed with quantity-frequency method based on the Nordic Alcohol Consumption Inventory. Weekly alcohol consumption was categorized into three groups: non-drinkers (<12 grams), moderate drinkers (12–167.9 grams for men, 12–83.9 grams for women) and heavy drinkers ( $\geq 168$  grams for men,  $\geq 84$  grams for women). Data were analyzed for men and women separately using multiple linear regression models, adjusted for age, occupational status, marital status, smoking, body mass index and leisure time physical activity. In women, moderate/heavy drinkers had lower fibre intake and moderate drinkers had higher vitamin D intake than non-drinkers. Male heavy drinkers had lower fibre, retinol, calcium and iron intake, and moderate/heavy drinkers had higher vitamin D intake than non-drinkers. Fish intake was higher among women moderate drinkers and men moderate/heavy drinkers than non-drinkers. In men, moderate drinkers had lower fruit intake and heavy drinkers had lower milk intake than non-drinkers. Moderate drinkers had higher energy intake from total fats and monosaturated fatty acids than non-drinkers. In contrast, energy intake from carbohydrates was lower among moderate/heavy drinkers than non-drinkers. In conclusion, especially male heavy drinkers had less favorable nutritional intake than moderate and non-drinkers. Further studies on the relationship between alcohol consumption and dietary habits are needed to plan a comprehensive dietary intervention programs in future.

**Citation:** Fawehinmi TO, Ilomäki J, Voutilainen S, Kauhanen J (2012) Alcohol Consumption and Dietary Patterns: The FinDrink Study. PLoS ONE 7(6): e38607. doi:10.1371/journal.pone.0038607

**Editor:** Conrad P. Earnest, University of Bath, United States of America

**Received:** September 29, 2011; **Accepted:** May 7, 2012; **Published:** June 12, 2012

**Copyright:** © 2012 Fawehinmi et al. This is an open-access article distributed under the terms of the Creative Commons Attribution License, which permits unrestricted use, distribution, and reproduction in any medium, provided the original author and source are credited.

**Funding:** This work was supported by the Academy of Finland (grants 201688 and 80185 to Dr. Voutilainen, grants 200942 and 118551 to Dr. Kauhanen) <http://www.aka.fi/eng>. The funders had no role in study design, data collection and analysis, decision to publish, or preparation of the manuscript.

**Competing Interests:** The authors have declared that no competing interests exist.

\* E-mail: [dapofawehinmi@gmail.com](mailto:dapofawehinmi@gmail.com)

## Introduction

Ethanol can replace almost 60 percent of daily calorie intake of adult chronic drinkers in some cases leading to malnutrition. Excessive consumption of alcohol may result in nutrient deficiencies reflecting variability in their clinical significance. Alcohol consumption changes metabolism of most nutrients and the consequences of these distortions may play a significant role in the pathogenesis of liver disease. Heavy alcohol consumption can alter carbohydrate and fibre metabolism causing alcoholic hypoglycemia and loss of protein. Alcohol intake inhibits the breakdown of triglycerides thus reducing the free fatty acid levels in the body [1]. The calorie-wasting effect of alcohol usually makes alcohol consumers to have altered nutritional status coupled with effect of rough lifestyle. This is partly as a result of nutritional distortion arising from associated illness like cancer, chronic liver diseases or infections [2,3].

A study assessing the nutritional status of 77 alcoholic patients in Spain, consuming more than 150 grams/day for longer than 5 years, found that the lean mass was decreased in alcohol drinkers which is related to the liver function derangement and alcohol consumption, and is also linked to increased mortality [3].

Dietary patterns are important screening instruments to prevent non-healthy eating habits such as consuming high-salt and low-fibre diet in alcohol drinkers. Diets that are in line with the present recommended nutritional guidelines have been shown to decrease the several risk factors for cardiovascular diseases [4].

Studies have been carried out in the context of alcohol drinking and nutritional patterns in several countries to assess the confounding roles of specific nutrients, dietary habits and beverage preferences [5–8] but there is a paucity of research on the association of alcohol consumption and dietary patterns. As part of the FinDrink study [9], this study is expected to provide information on the differences in the eating habits in relation to level of alcohol consumption in a Finnish population sample.

## Methods

### Ethics Statement

The Kuopio Ischaemic Heart Disease Risk Factor (KIHD) Study has been approved by the Research Ethics Committee of the University of Eastern Finland, Kuopio Campus. All the participants signed a written informed consent.

## Study Population

The data was obtained from the Kuopio Ischaemic Heart Disease Risk Factor (KIHD) Study. KIHD started as a population based cohort study in 1984 aiming at investigating the risk factors for chronic illnesses such as cardiovascular diseases amongst middle-age Finnish men living in eastern part of Finland [9]. Subjects were a random sample of 2682 men living in the Kuopio city and the neighboring rural communities, age stratified into four levels: 42, 48, 54 and 60 years at the baseline examination. Eligible participants must have been alive and reside in the sampling catchment area during the period of the study [10]. The subjects were recruited in two cohorts. The first cohort included 1166 men who received their baseline examination between March 1984 and August 1986. The second cohort consisted of 1516 men and they had their baseline examination between August 1986 and December 1989. While the first cohort was examined only at baseline, the second cohort was invited for re-examinations 11 years later in 1998–2001 to which 854 out of 1516 participated. The reasons for lost of follow-up from baseline to the 11-year examination were lack of critical baseline data that determined the eligibility to the follow-up examinations ( $n = 287$ ), death ( $n = 136$ ), refusal ( $n = 132$ ), severe illness ( $n = 50$ ), no contact ( $n = 44$ ), no address ( $n = 3$ ) and other ( $n = 6$ ). In 1998–2001, a random sample of 1351 women in the equivalent age group was invited from which 920 participated. The reasons for non-participation among women were refusal ( $n = 168$ ), severe illness ( $n = 97$ ), pre-menopause ( $n = 54$ ), no contact information ( $n = 51$ ), death ( $n = 14$ ), migration ( $n = 10$ ), no address ( $n = 3$ ) and others ( $n = 34$ ).

The present study utilized the data from the examinations conducted in 1998–2001 including 920 women and 854 men, aged 53–73 years. After excluding those with missing data on alcohol consumption and dietary intake, 904 women and 816 men were analyzed.

## Assessment of Alcohol Consumption

The level of alcohol consumption was evaluated through the use of self-administered questionnaire. Self reported alcohol consumption was assessed via quantity-frequency method based on the Nordic Alcohol Consumption Inventory [11] from which the average weekly alcohol consumption was calculated. These questions comprised of the quantity and frequency of alcohol consumption during the preceding year. One unit of alcohol contains an average 12 grams of 100% ethanol; (light beer = 11 grams, glass of wine = 12 grams and shot of hard liquor = 14 grams).

Men consuming at least 14 units of alcohol per week ( $\geq 168$  grams) were defined as heavy drinkers, those consuming between 1–13.9 units (12–167.9 grams) of alcohol weekly constitute the moderate drinkers while weekly alcohol intake of  $< 1$  unit (11.9 grams) represent non-drinker group. Among women, heavy drinkers were defined as consumption of  $\geq 7$  units/week ( $\geq 84$  grams) alcohol while moderate drinkers were defined as consuming 1–6.9 units/week (12–83.9 grams). Non-drinkers were defined as consuming  $< 1$  unit/week ( $< 12$  grams). The definition of heavy drinking is in accordance with the National Institute of Alcohol Abuse and Alcoholism [12] and Dietary Guidelines for Americans 2010 [13]. We decided to use lower levels than recommended by World Health Organization (low-risk drinking  $\leq 20$  grams/day for women and  $\leq 40$  grams/day for men) [14], because half of our sample was 65 years or older. The recommendations for alcohol consumption for people aged 65 years or older are lower [12].

## Assessment of Food Consumption

The nutritional consumption patterns were assessed using a 4-day food record diary [15]. The nutrient and energy intake was estimated through validated Nutrica software version 2.5 which employs Finnish values of nutrient food composition and takes into account losses from vitamins during food preparation [16]. The Nutrica software was developed by the Research Center of the Social Insurance Institution of Finland and it contains a broad database of over 1300 food items and more than 30 nutrient groups. Instructions were given to the participants by the nutritionist on how to fill in the food diary. These instructions included estimating portion sizes, the type of food, the time of day each participant ate or drank and the place of eating. The participants were given a food record sample before filling in the diary. Completed food records were checked by a nutritionist. The participants were advised not to change their normal eating habits.

The food intake groups include whole grain products such as rye products, fruits, berries, vegetables independently, total amount of fruits and vegetables, potatoes, root vegetables, milk, sour milk products, cheese, beef, fish, coffee and tea. The composition of whole grain products embraced different breads, flakes, bran, germ and muesli products, not including refined flour products. The rye product comprised of different rye breads, rye flour, flakes, bran and malt. The vegetable group contains all fresh and frozen vegetables, apart from pickled and canned vegetables. Carrots, Swedish turnip (swede), turnip and beetroot are types of the roots, which are frequently consumed in Finland where included with the exception potatoes, which were assigned into a separate group. The constituent of fruits group are fresh, canned and dried fruits as well as fruit nectars, while other juices were added into the fruit juices category. The berries group included fresh and frozen berries, crushed lingonberries and lingonberry jam which are commonly manufactured in Finland and they contain no sugar. The fish total group comprises of all fish and fish product. Milk category included fresh milk and whole milk. Sour milk category also contains yoghurt.

## Demographic Factors

Age and education were measured in years. Marital status was defined as married/couple, divorced/widow or single. Occupation types were differentiated into farmer, blue collar jobs, and white collar jobs while place of dwelling was either living in Kuopio city or rural areas. Demographic factors were collected via self-administered questionnaire.

## Behavioral and Biological Risk Factors

Diastolic and systolic blood pressure were measured using a random-zero mercury sphygmomanometer. Blood pressure was estimated by taking mean of six measurements which are three in supine, one in standing and two in sitting position [17]. The energy expenditure by conditioning leisure time physical activities were assessed by using a 12-month history modified from the Minnesota Leisure Time Physical Activity Questionnaire. The intensity of physical activity was measured in metabolic units (metabolic equivalent of task MET or metabolic equivalent of oxygen uptake) and one MET is equivalent to an energy expenditure of approximately 1 kcal/kg \* hour and oxygen consumption of 3.5 ml/kg \* minute. Energy expenditure expressed in kcal/week for every activity was estimated by multiplying the metabolic index of the activity (MET \* hour/week) by the weight of the body in kilograms [18].

Body mass index (BMI) was measured as weight in kilograms divided by the square of the height in meters. Low density lipoprotein (LDL) and high density lipoprotein (HDL) portions

were extracted from fresh serum by a method of combine ultracentrifugation and precipitation during the medical examination [17]. Smoking status and cigarette smoking were collected using self-administered questionnaire.

### Statistical Analysis

Descriptive statistics are presented as means ( $\pm$  standard deviation, SD) and proportions. For baseline characteristics, categorical variables were analyzed using Pearson's chi square test and continuous variables using one-way analysis of variance (ANOVA) and Kruskal Wallis Test. Multivariate models for men and women separately were computed using multiple linear regression adjusted with age, occupational status, marital status, smoking, body mass index and leisure time physical activity. We calculated adjusted beta coefficients ( $\beta$ ) with 95% confidence intervals (CI) and P values  $<0.05$  were considered statistically significant. Non-drinkers were used as the reference group in all analyses. When assumptions of dependent variable were not met, we transformed the variable either taking a logarithm ( $\log_{10}$ ) or a square root of the value. Statistical Package for the Social Sciences (SPSS) for windows version 17.0 was used to compute baseline characteristics and SAS version 9.3 was used to compute multivariate analyses.

## Results

### Demographic Factors

Among both sexes, alcohol consumption was related to the type of occupation and years of education ( $P<0.001$ ) (Table 1). In women, 87.5% of heavy drinkers were white collar workers while 79.4% and 61.9% represent white collar workers among moderate and non-drinkers, respectively. Among men, 60% of heavy drinkers were white collar workers. Among moderate and non-drinkers the proportions of white collar workers were 48.9% and 35.7%, correspondingly.

### Behavioral and Biological Risk Factors

The mean energy expenditure by conditioning leisure time physical activity was lower among the heavy drinkers compared with moderate and non-drinkers in women ( $P=0.002$ ) (Table 1). Heavy drinkers had slightly higher levels of HDL-cholesterol compared to non-drinkers ( $P<0.001$  for both sexes). The prevalence of cigarette smoking was also significantly higher amongst heavy drinkers than moderate and non-drinkers ( $P<0.001$ ). Of male heavy drinkers, 31.7% were current smokers while of moderate and non-drinkers 18.9% and 10.3% respectively were current smokers.

### Alcohol Consumption and Nutrient Intake

In women, moderate ( $\beta=-1.24$ ,  $P=0.016$ ) and heavy ( $\beta=-2.88$ ,  $P=0.005$ ) drinkers had lower fibre intake compared to non-drinkers after adjusting for all covariates (Table 2). Moderate drinkers also had slightly higher intake of vitamin D ( $\beta=0.12$ ,  $P=0.011$ ) than non-drinkers. In men, there was a lower intake of fibre ( $\beta=-4.09$ ,  $P<0.001$ ), retinol ( $\beta=-0.19$ ,  $P=0.035$ ), calcium ( $\beta=-0.12$ ,  $P=0.018$ ) and iron ( $\beta=-1.19$ ,  $P=0.019$ ) among heavy drinkers compared to non-drinkers. In contrast, compared to non-drinkers, moderate ( $\beta=0.19$ ,  $P<0.001$ ) and heavy ( $\beta=0.18$ ,  $P=0.016$ ) drinkers had higher intake of vitamin D.

### Alcohol Consumption and Food Intake

Women who were moderate drinkers had higher fish intake compared to non-drinkers ( $\beta=0.83$ ,  $P=0.035$ ) (Table 3). Among

men, fish intake was higher among moderate ( $\beta=1.40$ ,  $P=0.004$ ) and heavy ( $\beta=1.91$ ,  $P=0.007$ ) drinkers than among non-drinkers. Furthermore, fruit intake was lower among moderate drinkers ( $\beta=-1.28$ ,  $P=0.020$ ) and milk intake among heavy drinkers ( $\beta=-0.49$ ,  $P<0.001$ ) compared to non-drinkers.

### Alcohol Consumption and Energy Intake

Moderate drinkers had higher energy intake from total fats and monosaturated fatty acids than non-drinkers (women  $\beta=1.24$ ,  $P=0.006$  and  $\beta=0.56$ ,  $P=0.003$ ; men  $\beta=1.05$ ,  $P=0.030$  and  $\beta=0.42$ ,  $P=0.032$ , respectively) (Table 4). Women who were moderate drinkers had higher intake of polysaturated fatty acids as well ( $\beta=0.30$ ,  $P=0.006$ ). In contrast, energy intake from carbohydrates was lower among moderate and heavy drinkers than non-drinkers among men ( $\beta=-3.49$ ,  $P<0.001$  for moderate drinkers and  $\beta=-7.56$ ,  $P<0.001$  for heavy drinkers) and women ( $\beta=-3.48$ ,  $P<0.001$  for moderate drinkers,  $\beta=-6.47$ ,  $P<0.001$  for heavy drinkers). Total energy intake did not differ according to drinking status.

## Discussion

### Food Intake

Alcohol consumption was associated with certain food intake in both men and women. Increasing alcohol consumption was associated with higher fish intake while male heavy drinkers had lower intake of milk than non-drinkers. This is consistent with the study of Ruf et al [19], who found that there were increased intakes observed for animal products such as beef, eggs, fish and low intake of dairy products among participants who consumed high amount of alcohol. Likewise, Männistö and colleagues [20] found that intake of fish and poultry products was associated with increased alcohol drinking while milk and cream intakes reduced with alcohol consumption. Similarly, a Danish study found that alcohol intake (especially wine) was associated with higher intake of fish and also fruits in both men and women [21]. In our study, we also found in crude analyses that moderate drinkers have higher fruit intake than non-drinkers. However, when adjusted for confounders, the association changed direction which means that higher fruit intake in moderate drinkers was explained by other factors. Overall, moderate alcohol consumption has been found to be associated with healthy dietary lifestyles compared with other drinkers or non-drinkers [21,22], which was not confirmed in our study.

### Energy Intake

Previous studies have found that increased consumption of ethanol, increases total daily energy intake significantly [6,19]. We found no difference in total energy intake between alcohol consumption groups. However, the participants were instructed to abstain from alcohol consumption during the 4-day Food diary record period, thus the higher BMI among female heavy drinkers may be due to excess energy from their usual alcohol consumption. On the other hand, we did find that the sources of energy were different between moderate/heavy drinkers compared to non-drinkers. Consistent with earlier studies [20,19], alcohol drinkers tend to get energy from fats while energy from carbohydrate intake was lower than in non-drinkers.

### Nutrient Intake

The lower intake of fibre observed in heavy drinkers corroborate with the findings of Ruf et al [19]. Low consumption of fibre detected among heavy alcohol consumers could lead to harmful health effects if the observed nutritional habits are continued over

**Table 1.** Baseline characteristics of participants according to alcoholic consumption.

|                                    | Alcohol consumption (g/wk) |                                    |                       |                         |                                     |                              |             | p-value* |
|------------------------------------|----------------------------|------------------------------------|-----------------------|-------------------------|-------------------------------------|------------------------------|-------------|----------|
|                                    | Women                      |                                    |                       | Men                     |                                     |                              |             |          |
|                                    | <12.0<br>(none)<br>n = 604 | 12.0–83.9<br>(moderate)<br>n = 252 | ≥84 (heavy)<br>n = 48 | <12.0 (none)<br>n = 252 | 12.0–167.9<br>(moderate)<br>n = 444 | ≥168.0<br>(heavy)<br>n = 120 |             |          |
| Age, years                         | 64.0±6.5                   | 61.8±6.1                           | 59.0±5.9              | <0.001                  | 64.5±6.1                            | 61.9±6.3                     | 60.3±6.6    | <0.001   |
| Place of dwelling                  | 0.074                      |                                    |                       |                         |                                     |                              |             | 0.037    |
| Kuopio city, %(n)                  | 58.6(354)                  | 61.5(155)                          | 75.0(36)              |                         | 48.0(121)                           | 39.6(176)                    | 35.8(43)    |          |
| Occupation                         | <0.001                     |                                    |                       |                         |                                     |                              |             | <0.001   |
| Farmer, %(n)                       | 19.0(115)                  | 7.5(19)                            | 2.1(1)                |                         | 16.7(42)                            | 9.0(40)                      | 6.7(8)      |          |
| Blue collar, %(n)                  | 19.0(115)                  | 13.1(33)                           | 10.4(5)               |                         | 47.6(120)                           | 42.1(187)                    | 33.3(40)    |          |
| White collar, %(n)                 | 61.9(374)                  | 79.4(200)                          | 87.5(42)              |                         | 35.7(90)                            | 48.9(217)                    | 60.0(72)    |          |
| Marital status                     | 0.082                      |                                    |                       |                         |                                     |                              |             | 0.001    |
| Married/Couple, %(n)               | 64.9(392)                  | 65.9(166)                          | 77.1(37)              |                         | 82.1(207)                           | 87.2(387)                    | 85.2(695)   |          |
| Single, %(n)                       | 10.1(61)                   | 5.6(14)                            | 4.2(2)                |                         | 9.9(25)                             | 3.2(14)                      | 2.5(3)      |          |
| Divorced/Widow, %(n)               | 25.0(151)                  | 28.6(72)                           | 18.8(9)               |                         | 7.9(20)                             | 9.7(43)                      | 13.3(16)    |          |
| Education, years                   | 9.3±3.3                    | 10.3±3.5                           | 10.8±3.4              | <0.001                  | 8.6±3.1                             | 9.8±3.7                      | 10.3±3.7    | <0.001   |
| Cigarettes, day                    | 0.5±2.4                    | 1.4±4.4                            | 3.8±7.4               | <0.001                  | 0.5±2.4                             | 1.7±4.9                      | 5.3±7.4     | <0.001   |
| Smoking status                     | <0.001                     |                                    |                       |                         |                                     |                              |             | <0.001   |
| Non-smoker, %(n)                   | 86.8(524)                  | 68.7(173)                          | 47.9(23)              |                         | 46.4(117)                           | 36.0(160)                    | 21.7(26)    |          |
| Previous smoker, %(n)              | 8.3(50)                    | 18.7(47)                           | 27.1(13)              |                         | 43.3(109)                           | 45.0(200)                    | 46.7(56)    |          |
| Current smoker, %(n)               | 5.0(30)                    | 12.7(32)                           | 25.0(12)              |                         | 10.3 (26)                           | 18.9(84)                     | 31.7(38)    |          |
| Energy expenditure, Kcal/d         | 175.5±178.2                | 219.8±272.6                        | 123.2±166.2           | 0.002                   | 188.2±202.6                         | 190.7±195.0                  | 147.6±145.0 | 0.059    |
| Body mass index, kg/m <sup>2</sup> | 28.5±5.3                   | 27.6±4.5                           | 29.4±5.3              | 0.046                   | 27.1±3.6                            | 27.3±3.5                     | 28.1±4.1    | 0.110    |
| Mean systolic BP, mmHg             | 138.0±17.6                 | 135.3±16.8                         | 139.4±15.2            | 0.090                   | 134.1±18.3                          | 133.7±16.7                   | 136.7±15.7  | 0.230    |
| Mean diastolic BP, mmHg            | 80.0±8.6                   | 81.0±8.5                           | 83.6±7.7              | 0.009                   | 80.3±9.6                            | 82.0±8.9                     | 84.9±9.2    | 0.000    |
| S-total cholesterol, mmol/l        | 5.7±0.9                    | 5.8±0.9                            | 5.7±0.8               | 0.250                   | 5.2±0.9                             | 5.3±1.0                      | 5.3±0.9     | 0.012    |
| S-LDL-Chol, mmol/l                 | 3.7±0.9                    | 3.7±0.9                            | 3.7±0.8               | 0.949                   | 3.4±0.8                             | 3.5±1.0                      | 3.4±0.9     | 0.164    |
| S-HDL-Chol, mmol/l                 | 1.3±0.3                    | 1.4±0.3                            | 1.4±0.3               | <0.001                  | 1.1±0.3                             | 1.1±0.3                      | 1.2±0.3     | <0.001   |

Abbreviations: BP = Blood pressure; S-LDL-Chol = Serum low density lipoprotein cholesterol; S-HDL-Chol = Serum High density lipoprotein cholesterol.

\*Calculated using Pearson's chi-square test for categorical and ANOVA or Kruskal-Wallis test for continuous variables. Data expressed as the mean ± standard deviation unless otherwise indicated.

doi:10.1371/journal.pone.0038607.t001

a long period of time. In a recent prospective study among middle-aged people in several states in United States, dietary fibre intake lowered the risk of mortality from cardiovascular diseases, communicable and pulmonary diseases by 24% to 56% in men and by 34% to 59% in women [23]. A Finnish cohort study by Pietinen et al [24] found that higher intake of fibre may be protective against coronary heart disease especially coronary mortality. Furthermore, previous study conducted in our study sample (the KIHHD data) found that daily intake of high folate was associated with decrease in the risk of acute coronary event [15]. This means that heavy drinkers may be in an increased risk of coronary events due to low fibre [24] and folate intakes [15]. We have previously reported that heavy drinkers in the KIHHD study have an increased risk of myocardial infarction [25] and increased risk of CVD [26] among men.

Moderate and heavy consumers of alcohol had a significantly higher intake of vitamin D in comparison with non-drinkers. This might be attributed to the higher fish consumption. This finding was consistent with the results of a recent study by Matsui et al [27], who found relatively high levels of vitamin D in male heavy drinkers during their interventional study. Possible explanation

may also be a physiological compensation for potential calcium deficiency that arises in heavy alcohol consumers as a result of higher levels of vitamin D. This will eventually lead to maintenance of the calcium homeostasis [28]. However, in our analyses calcium intake was only slightly lower among heavy drinkers compared to non-drinkers.

We found an association between alcohol consumption and BMI as well as energy expenditure based on leisure time physical activity in women but not in men. The lower BMI in the female moderate drinkers compared to non-drinkers partly substantiate the findings by Colditz et al. [29], Barefoot et al. [7] and Ruf et al. [19], in which an inverse relationship between alcohol consumption and BMI was detected. Different form of physical activity may be responsible for these findings [30]. This also confirms our results that female non-drinkers had lower energy expenditure by conditioning leisure time physical activities compared moderate drinkers. However, in contrast to other studies [29,30], we found that female heavy drinkers had higher BMI and lower physical activity than non and moderate drinkers.

Compared to the situation in 1998/2001 with current state, the unemployment rate was higher and the consumption expenditure



**Table 2.** Nutrient intake based on the 4-Day Food Diary according to alcohol consumption.

|                        | Women              |             |       |              |         | Men                |             |       |              |         |
|------------------------|--------------------|-------------|-------|--------------|---------|--------------------|-------------|-------|--------------|---------|
|                        | Alcohol category   | mean ± SD*  | β**   | 95% CI       | P-value | Alcohol category   | mean ± SD*  | β**   | 95% CI       | P-value |
| Fibre, g               | None (n = 604)     | 20.2 ± 6.8  | ref   |              |         | None (n = 252)     | 26.4 ± 9.6  | ref   |              |         |
|                        | Moderate (n = 252) | 19.1 ± 6.3  | -1.24 | -2.25, -0.23 | 0.016   | Moderate (n = 444) | 24.8 ± 9.9  | -1.49 | -3.03, 0.05  | 0.057   |
|                        | Heavy (n = 48)     | 17.3 ± 6.2  | -2.88 | -4.90, -0.86 | 0.005   | Heavy (n = 120)    | 21.2 ± 9.2  | -4.09 | -6.30, -1.87 | <0.001  |
| Retinol equivalent, µg | None (n = 604)     | 1127 ± 1951 | ref   |              |         | None (n = 252)     | 1140 ± 1571 | ref   |              |         |
|                        | Moderate (n = 252) | 1211 ± 2006 | 0.03  | -0.08, 0.15  | 0.587   | Moderate (n = 444) | 1393 ± 2379 | 0.03  | -0.10, 0.15  | 0.677   |
|                        | Heavy (n = 48)     | 1224 ± 1350 | 0.01  | -0.22, 0.24  | 0.923   | Heavy (n = 120)    | 1052 ± 1654 | -0.19 | -0.37, -0.01 | 0.035   |
| Vitamin D, µg          | None (n = 604)     | 5.1 ± 4.1   | ref   |              |         | None (n = 252)     | 6.8 ± 6.4   | ref   |              |         |
|                        | Moderate (n = 252) | 5.7 ± 4.6   | 0.12  | 0.03, 0.21   | 0.011   | Moderate (n = 444) | 8.4 ± 7.7   | 0.19  | 0.08, 0.29   | <0.001  |
|                        | Heavy (n = 48)     | 4.9 ± 3.7   | 0.05  | -0.14, 0.23  | 0.622   | Heavy (n = 120)    | 8.0 ± 7.6   | 0.18  | 0.03, 0.33   | 0.016   |
| Calcium, mg            | None (n = 604)     | 908 ± 350   | ref   |              |         | None (n = 252)     | 1136 ± 451  | ref   |              |         |
|                        | Moderate (n = 252) | 934 ± 344   | 0.01  | -0.05, 0.07  | 0.694   | Moderate (n = 444) | 1113 ± 472  | -0.01 | -0.08, 0.06  | 0.696   |
|                        | Heavy (n = 48)     | 882 ± 343   | -0.09 | -0.22, 0.03  | 0.141   | Heavy (n = 120)    | 1000 ± 449  | -0.12 | -0.22, -0.02 | 0.018   |
| Iron, mg               | None (n = 604)     | 9.8 ± 3.5   | ref   |              |         | None (n = 252)     | 12.7 ± 4.3  | ref   |              |         |
|                        | Moderate (n = 252) | 10.0 ± 3.6  | 0.27  | -0.28, 0.81  | 0.341   | Moderate (n = 444) | 12.9 ± 4.4  | 0.07  | -0.63, 0.76  | 0.852   |
|                        | Heavy (n = 48)     | 10.4 ± 3.9  | 0.50  | -0.60, 1.60  | 0.371   | Heavy (n = 120)    | 11.5 ± 3.8  | -1.19 | -2.18, -0.19 | 0.019   |
| Folate, µg             | None (n = 604)     | 217 ± 73    | ref   |              |         | None (n = 252)     | 252 ± 82    | ref   |              |         |
|                        | Moderate (n = 252) | 225 ± 71    | 0.02  | -0.03, 0.07  | 0.407   | Moderate (n = 444) | 256 ± 79    | 0.01  | -0.04, 0.06  | 0.673   |
|                        | Heavy (n = 48)     | 210 ± 59    | -0.05 | -0.14, 0.05  | 0.310   | Heavy (n = 120)    | 236 ± 79    | -0.05 | -0.12, 0.03  | 0.211   |
| Vitamin C, mg          | None (n = 604)     | 89.7 ± 57.0 | ref   |              |         | None (n = 252)     | 82.0 ± 61.1 | ref   |              |         |
|                        | Moderate (n = 252) | 92.0 ± 59.0 | -0.01 | -0.11, 0.08  | 0.760   | Moderate (n = 444) | 79.4 ± 57.9 | -0.06 | -0.17, 0.05  | 0.272   |
|                        | Heavy (n = 48)     | 98.7 ± 64.8 | 0.06  | -0.13, 0.25  | 0.559   | Heavy (n = 120)    | 77.1 ± 55.1 | -0.08 | -0.23, 0.08  | 0.337   |

\*unadjusted means ± standard deviation.

\*\*beta coefficient adjusted with age, occupation, marital status, smoking, body mass index and leisure time physical activity.

doi:10.1371/journal.pone.0038607.t002

was lower in all occupation groups [31]. The consumption expenditure specifically to alcoholic beverages increased among blue and white collar workers and decreased among farmers [32]. Furthermore, alcohol tax was reduced by 33% in 2004, although increased by 10% in 2009 [33]. Overall, the affordability of alcoholic beverages today is higher than at the time of the study. In a companion paper by Fawehinmi et al [34], performed on the baseline population of the KIID Study; we reported that male heavy drinkers aged 42–60 years had a lower intake of milk, whole grains, fibre, folate, vitamin C, tea and iron than moderate and non-drinkers. Higher intake of legumes, fish and beef was found among heavy drinkers compared to moderate and non-drinkers. These results are similar to our current study conducted 11 years after the baseline.

### Strengths and Limitations

The fairly large sample size, being representative of the population of Eastern Finland is one of the strengths of this research. Another strong point of our study was that we were able to analyze men and women separately and also to adjust the analyses for age, occupational status, marital status, smoking, BMI and physical activity. However, the group of heavy drinking women was relatively small (n = 48) which limits making firm conclusions on this group. Limitations of this study include its cross-sectional nature which does not allow for establishment of causal association. In the future, longitudinal studies are needed to assess causal association between alcohol consumption and dietary patterns. Alcohol consumption was measured by self-report and

people tend to under-report their alcohol consumption. It is also possible that there is a lack of interest for chronic alcohol drinkers to fill in the questionnaire, thus affecting the quality of the information obtained and introduction of information bias [35]. The mean age of the participants was 61 years (women) and 62 years (men). The association between alcohol consumption and dietary patterns might be different among younger people who have different drinking habits [36].

### Conclusions and Public Health Implication

The harmful effects of diet rich in fat and low in some essential vitamins in the development of chronic illness are perceived as the leading cause of high mortality in developing and developed countries [37]. In this study, we showed that male participants who were heavy drinkers had a lower intake of several nutrients, such as calcium, iron and fibre compared to non-drinkers. Sufficient intake of essential nutrients is important to prevent chronic diseases such as cardiovascular diseases and osteoporosis which are related to lack of these nutrients. Osteoporosis increases the risk of hip fractures which is a strong predictor of mortality [38]. Cardiovascular diseases (CVD) are key causes of premature deaths, morbidity and disability in nearly all countries [39]. Furthermore, alcohol consumption is a known factor particularly for an increase in CVD risk [40–42]. CVDs are the leading causes of deaths in Finland being responsible for 39% of all deaths among men [43]. Numerous CVD risk factors have now been proven to be decreased with eating habits that are in-line with the current guideline

**Table 3.** Daily food intake based on the 4-Day Food Dairy according to alcohol consumption.

|                       | Women              |             |       |             |         | Men                |             |       |              |         |
|-----------------------|--------------------|-------------|-------|-------------|---------|--------------------|-------------|-------|--------------|---------|
|                       | Alcohol category   | mean±SD*    | β**   | 95% CI      | P-value | Alcohol category   | mean±SD*    | β**   | 95% CI       | P-value |
| Vegetables, g         | None (n = 604)     | 151.7±185.2 | ref   |             |         | None (n = 252)     | 126.3±154.6 | ref   |              |         |
|                       | Moderate (n = 252) | 179.7±216.8 | 0.11  | -0.05, 0.27 | 0.189   | Moderate (n = 444) | 137.0±168.0 | -0.02 | -0.20, 0.16  | 0.832   |
|                       | Heavy (n = 48)     | 171.8±175.4 | 0.23  | -0.10, 0.56 | 0.169   | Heavy (n = 120)    | 166.5±241.6 | 0.11  | -0.16, 0.37  | 0.420   |
| Fruits, g             | None (n = 604)     | 161.7±216.2 | ref   |             |         | None (n = 252)     | 161.7±216.2 | ref   |              |         |
|                       | Moderate (n = 252) | 177.8±261.6 | -0.36 | -1.43, 0.71 | 0.504   | Moderate (n = 444) | 181.4±260.0 | -1.28 | -2.37, -0.20 | 0.020   |
|                       | Heavy (n = 48)     | 191.0±234.3 | -0.26 | -2.41, 1.89 | 0.813   | Heavy (n = 120)    | 135.8±171.8 | -1.23 | -2.79, 0.33  | 0.122   |
| Legumes, g            | None (n = 604)     | 4.8±17.6    | ref   |             |         | None (n = 252)     | 4.9±13.1    | ref   |              |         |
|                       | Moderate (n = 252) | 5.6±13.1    | 0.14  | -0.10, 0.38 | 0.247   | Moderate (n = 444) | 4.2±12.3    | -0.06 | -0.30, 0.17  | 0.593   |
|                       | Heavy (n = 48)     | 5.4±17.4    | 0.00  | -0.47, 0.48 | 0.996   | Heavy (n = 120)    | 4.6±10.9    | 0.03  | -0.31, 0.36  | 0.877   |
| Fish total, g         | None (n = 604)     | 62.2±105.9  | ref   |             |         | None (n = 252)     | 79.4±122.6  | ref   |              |         |
|                       | Moderate (n = 252) | 68.6±97.4   | 0.83  | 0.06, 1.60  | 0.035   | Moderate (n = 444) | 100.5±151.3 | 1.40  | 0.44, 2.36   | 0.004   |
|                       | Heavy (n = 48)     | 70.0±88.7   | 1.35  | -0.19, 2.90 | 0.086   | Heavy (n = 120)    | 105.2±160.6 | 1.91  | 0.52, 3.29   | 0.007   |
| Beef g                | None (n = 604)     | 71.0±109.2  | ref   |             |         | None (n = 252)     | 82.4±109.8  | ref   |              |         |
|                       | Moderate (n = 252) | 71.8±82.5   | 0.21  | -0.48, 0.90 | 0.555   | Moderate (n = 444) | 91.4±106.3  | 0.08  | -0.69, 0.86  | 0.831   |
|                       | Heavy (n = 48)     | 92.0±103.3  | 0.95  | -0.45, 2.34 | 0.183   | Heavy (n = 120)    | 117.4±148.1 | 0.68  | -0.44, 1.81  | 0.231   |
| Milk, g               | None (n = 604)     | 422.1±529.2 | ref   |             |         | None (n = 252)     | 664.1±817.1 | ref   |              |         |
|                       | Moderate (n = 252) | 358.4±471.3 | -0.10 | -0.28, 0.08 | 0.267   | Moderate (n = 444) | 497.3±458.3 | -0.13 | -0.33, 0.07  | 0.213   |
|                       | Heavy (n = 48)     | 285.0±326.4 | -0.33 | -0.69, 0.03 | 0.077   | Heavy (n = 120)    | 393.3±446.3 | -0.49 | -0.78, -0.20 | <0.001  |
| Sour milk products, g | None (n = 604)     | 211.6±350.7 | ref   |             |         | None (n = 252)     | 208.5±347.7 | Ref   |              |         |
|                       | Moderate (n = 252) | 219.2±373.0 | 0.19  | -1.23, 1.61 | 0.790   | Moderate (n = 444) | 194.8±381.8 | -0.72 | -2.34, 0.90  | 0.382   |
|                       | Heavy (n = 48)     | 143.6±184.8 | -1.71 | -4.56, 1.14 | 0.240   | Heavy (n = 120)    | 185.5±467.8 | -1.35 | -3.68, 0.98  | 0.256   |
| Butter, g             | None (n = 604)     | 16.5±28.3   | ref   |             |         | None (n = 252)     | 29.0±42.4   | Ref   |              |         |
|                       | Moderate (n = 252) | 16.0±27.7   | -0.00 | -0.37, 0.37 | 0.996   | Moderate (n = 444) | 26.4±44.8   | -0.04 | -0.54, 0.46  | 0.876   |
|                       | Heavy (n = 48)     | 16.8±24.4   | 0.01  | -0.73, 0.76 | 0.973   | Heavy (n = 120)    | 24.6±35.7   | -0.10 | -0.81, 0.61  | 0.783   |
| Coffee, g             | None (n = 604)     | 546.0±608.5 | ref   |             |         | None (n = 252)     | 592.2±651.0 | ref   |              |         |
|                       | Moderate (n = 252) | 552.7±553.8 | 0.33  | -1.25, 1.90 | 0.684   | Moderate (n = 444) | 641.0±671.8 | 1.04  | -0.68, 2.77  | 0.235   |
|                       | Heavy (n = 48)     | 568.5±788.4 | -1.27 | -4.44, 1.89 | 0.429   | Heavy (n = 120)    | 597.3±584.6 | -0.27 | -2.76, 2.21  | 0.830   |
| Whole grain, g        | None (n = 604)     | 154.1±142.4 | ref   |             |         | None (n = 252)     | 236.6±198.1 | ref   |              |         |
|                       | Moderate (n = 252) | 141.0±171.1 | -0.11 | -0.23, 0.01 | 0.073   | Moderate (n = 444) | 228.4±220.6 | -0.07 | -0.19, 0.06  | 0.323   |
|                       | Heavy (n = 48)     | 140.3±124.0 | -0.05 | -0.28, 0.19 | 0.699   | Heavy (n = 120)    | 201.2±199.3 | -0.09 | -0.28, 0.09  | 0.321   |
| Tea, g                | None (n = 604)     | 151.5±361.2 | ref   |             |         | None (n = 252)     | 139.6±236.6 | ref   |              |         |
|                       | Moderate (n = 252) | 141.3±345.7 | -0.23 | -1.67, 1.21 | 0.752   | Moderate (n = 444) | 152.2±335.9 | 0.54  | -1.00, 2.04  | 0.484   |
|                       | Heavy (n = 48)     | 153.4±359.9 | 0.64  | -2.26, 3.53 | 0.665   | Heavy (n = 120)    | 161.4±372.3 | 1.33  | -0.83, 3.49  | 0.228   |
| Rye products, g       | None (n = 604)     | 102.1±108.1 | ref   |             |         | None (n = 252)     | 173.1±162.9 | ref   |              |         |
|                       | Moderate (n = 252) | 92.2±108.0  | -0.55 | -1.21, 0.11 | 0.105   | Moderate (n = 444) | 160.9±181.3 | -0.76 | -1.70, 0.18  | 0.111   |
|                       | Heavy (n = 48)     | 89.9±110.9  | -0.84 | -2.18, 0.49 | 0.215   | Heavy (n = 120)    | 157.8±204.7 | -0.47 | -1.82, 0.88  | 0.498   |

\*unadjusted means ± standard deviation.

\*\*beta coefficient adjusted with age, occupation, marital status, smoking, body mass index and leisure time physical activity.

doi:10.1371/journal.pone.0038607.t003

recommendations. Many interventional and epidemiological studies have found that a number of dietary patterns and light-to-moderate alcohol consumption is cardio-protective [44–46]. Mediterranean diet, which contains alcoholic beverages (typically red wine) add an autonomous cardiovascular benefit to this diet [47]. It has also been reported that light-to-moderate alcohol consumption results into decrease in CVD deaths [48] as well as reduction in the risk of stroke [49]. Menotti and colleagues [44] investigated the food intake habits and 25 year mortality from CHD risk in seven countries. Their findings revealed that intake

of vegetables, fish and alcohol was inversely associated with CHD mortality. People on mediterranean diet (MD) (high amount of vegetables, olive oil, alcohol and fish) had lowest mortality from the seven countries included in the study. In elderly people, healthier dietary patterns like MD was associated with lower likelihood of having CVD risk factors [50]. These findings propose that MD has an important effect in protecting CVDs. It is important that health care professionals are aware of the possible nutrient deficiency among middle-aged and older men based on their alcohol consumption levels. More attention

**Table 4.** Energy intake based on the 4-Day Food Diary according to alcohol consumption.

|                           | Women              |            |       |              |         | Men                |            |       |              |         |
|---------------------------|--------------------|------------|-------|--------------|---------|--------------------|------------|-------|--------------|---------|
|                           | Alcohol category   | mean ± SD* | β**   | 95% CI       | P-value | Alcohol category   | mean ± SD* | β**   | 95% CI       | P-value |
| Total energy intake, Kcal | None (n = 604)     | 1544 ± 421 | ref   |              |         | None (n = 252)     | 2084 ± 600 | ref   |              |         |
|                           | Moderate (n = 252) | 1601 ± 439 | 0.03  | -0.01, 0.07  | 0.136   | Moderate (n = 444) | 2160 ± 567 | 0.04  | -0.01, 0.08  | 0.093   |
|                           | Heavy (n = 48)     | 1635 ± 438 | 0.03  | -0.05, 0.11  | 0.472   | Heavy (n = 120)    | 2048 ± 566 | -0.01 | -0.07, 0.06  | 0.840   |
| Fat, E%                   | None (n = 604)     | 32.4 ± 5.6 | ref   |              |         | None (n = 252)     | 33.7 ± 5.9 | ref   |              |         |
|                           | Moderate (n = 252) | 33.8 ± 5.8 | 1.24  | 0.36, 2.11   | 0.006   | Moderate (n = 444) | 34.7 ± 5.9 | 1.05  | 0.10, 2.00   | 0.030   |
|                           | Heavy (n = 48)     | 34.3 ± 7.0 | 1.09  | -0.66, 2.85  | 0.222   | Heavy (n = 120)    | 33.8 ± 6.2 | -0.15 | -1.51, 1.22  | 0.834   |
| SAFA, E%                  | None (n = 604)     | 13.7 ± 3.2 | ref   |              |         | None (n = 252)     | 14.2 ± 3.7 | ref   |              |         |
|                           | Moderate (n = 252) | 14.1 ± 3.0 | 0.28  | -0.20, 0.76  | 0.246   | Moderate (n = 444) | 14.5 ± 3.5 | 0.37  | -0.19, 0.93  | 0.191   |
|                           | Heavy (n = 48)     | 14.4 ± 3.4 | 0.14  | -0.84, 1.10  | 0.782   | Heavy (n = 120)    | 13.9 ± 3.3 | -0.35 | -1.15, 0.45  | 0.391   |
| MUFA, E%                  | None (n = 604)     | 10.4 ± 2.4 | ref   |              |         | None (n = 252)     | 10.9 ± 2.3 | ref   |              |         |
|                           | Moderate (n = 252) | 11.0 ± 2.4 | 0.56  | 0.19, 0.93   | 0.003   | Moderate (n = 444) | 11.4 ± 2.4 | 0.42  | 0.04, 0.81   | 0.032   |
|                           | Heavy (n = 48)     | 11.3 ± 3.0 | 0.68  | -0.06, 1.42  | 0.072   | Heavy (n = 120)    | 11.3 ± 2.7 | 0.26  | -0.30, 0.82  | 0.364   |
| PUFA, E%                  | None (n = 604)     | 4.7 ± 1.3  | ref   |              |         | None (n = 252)     | 4.9 ± 1.4  | ref   |              |         |
|                           | Moderate (n = 252) | 5.0 ± 1.5  | 0.30  | 0.09, 0.51   | 0.006   | Moderate (n = 444) | 5.1 ± 1.4  | 0.19  | -0.04, 0.41  | 0.100   |
|                           | Heavy (n = 48)     | 5.1 ± 1.5  | 0.37  | -0.05, 0.80  | 0.085   | Heavy (n = 120)    | 4.9 ± 1.4  | -0.06 | -0.39, 0.26  | 0.700   |
| Carbohydrates, E%         | None (n = 604)     | 50.0 ± 5.8 | ref   |              |         | None (n = 252)     | 49.3 ± 6.2 | ref   |              |         |
|                           | Moderate (n = 252) | 46.3 ± 6.1 | -3.48 | -4.38, -2.59 | <0.001  | Moderate (n = 444) | 45.3 ± 6.6 | -3.49 | -4.51, -2.46 | <0.001  |
|                           | Heavy (n = 48)     | 42.2 ± 7.3 | -6.47 | -8.28, -4.67 | <0.001  | Heavy (n = 120)    | 40.4 ± 7.1 | -7.56 | -9.04, -6.08 | <0.001  |

Abbreviations: SAFA = Saturated fatty acids; MUFA = Monounsaturated fatty acids; PUFA = Polyunsaturated fatty acids.

\*unadjusted means ± standard deviation.

\*\*beta coefficient adjusted with age, occupation, marital status, smoking, body mass index and leisure time physical activity.

doi:10.1371/journal.pone.0038607.t004

should be paid to nutrient intake and safe levels of alcohol consumption for those who drink large amount of alcohol.

## Acknowledgments

We express gratitude to staff of the former Research Institute of Public Health, University of Eastern Finland, Kuopio campus; they have done the biggest work for data collection. We are indebted to Kimmo Ronkainen, MSc, at Institute of Public Health and Clinical Nutrition, University of Eastern Finland for data management. We thank the staff of the Pacific

Institute for Research and Evaluation, Prevention Research Center, Berkeley, California, USA, for supporting to develop the study in 2002–2003.

## Author Contributions

Conceived and designed the experiments: TOF JI SV JK. Analyzed the data: TOF JI SV. Contributed reagents/materials/analysis tools: TOF JI SV JK. Wrote the paper: TOF JI SV JK.

## References

- Bunout D (1999) Nutritional and metabolic effects of alcoholism: their relationship with alcoholic liver disease. *Nutrition* 15: 583–589.
- Santolaria F, Perez-Manzano JL, Milena A, Gonzalez-Reimers E, Gomez-Rodriguez MA, et al. (2000) Nutritional assessment in alcoholic patients. Its relationship with alcoholic intake, feeding habits, organic complications and social problems. *Drug Alcohol Depend* 59: 295–304.
- Gonzalez-Reimers E, Garcia-Valdecasas-Campelo E, Santolaria-Fernandez F, Sanchez-Perez MJ, Rodriguez-Rodriguez E, et al. (2008) Prognostic value of nutritional status in alcoholics, assessed by double-energy X-ray absorptiometry. *Alcohol Alcohol* 43: 314–319.
- Jeeranun K, Duangporn K (2008) Dietary patterns for reducing cardiovascular disease risk among Thai alcohol drinkers. *Nutr Diet* 65: 272–278.
- Jacques PF, Sulsky S, Hartz SC, Russell RM (1989) Moderate alcohol intake and nutritional status in nonalcoholic elderly subjects. *Am J Clin Nutr* 50: 875–883.
- Kesse E, Clavel-Chapelon F, Slimani N, van Lier M, E3N Group (2001) Do eating habits differ according to alcohol consumption? Results of a study of the French cohort of the European Prospective Investigation into Cancer and Nutrition (E3N-EPIC). *Am J Clin Nutr* 74: 322–327.
- Barefoot JC, Gronback M, Feagans JR, McPherson RS, Williams RB, et al. (2002) Alcoholic beverage preference, diet, and health habits in the UNC Alumni Heart Study. *Am J Clin Nutr* 76: 466–472.
- Breslow RA, Guenther PM, Smothers BA (2006) Alcohol drinking patterns and diet quality: the 1999–2000 National Health and Nutrition Examination Survey. *Am J Epidemiol* 163: 359–366.
- Ilomäki J, Korhonen MJ, Lavikainen P, Lipton R, Enlund H, et al. (2010) Changes in alcohol consumption and drinking patterns during 11 years of follow-up among ageing men: the FinDrink study. *Eur J Public Health* 20: 133–138.
- Wilson TW, Kaplan GA, Kautanen J, Cohen RD, Wu M, et al. (1993) Association between Plasma Fibrinogen Concentration and Five Socioeconomic Indices in the Kuopio Ischemic Heart Disease Risk Factor Study. *Am J Epidemiol* 137: 292–300.
- Irgens-Jensen O (1992) Bruk av alkohol og narkotika blant tilsatte I forsvaret – Resultater av en spørreskjemaundersøkelse høsten 1991 [In Norwegian] (Use of alcohol and narcotics in the defenses – results from a questionnaire survey fall 1991). Oslo: National institute of alcohol and drug research SIFA. 40 p.
- Willenbring ML, Massey SH, Gardner MB (2009) Helping patients who drink too much: An Evidence-Based Guide for Primary Care Physicians. *Am Fam Physician* 80: 44–50.
- U.S. Department of Agriculture, U.S. Department of Health and Human Services (2010) Dietary Guidelines for Americans, 7th Ed (2010). Washington DC: U.S. Government Printing Office 95 p.
- World Health Organization, Department of Mental Health and Substance Dependence (2000) International guide for monitoring alcohol consumption and related harm. Geneva: World Health Organization 192 p.
- Voutilainen S, Rissanen TH, Virtanen J, Lakka TA, Salonen JT (2001) Low dietary folate intake is associated with an excess incidence of acute coronary events: The Kuopio Ischemic Heart Disease Risk Factor Study. *Circulation* 103: 2674–2680.

16. Hakala P, Knuts LR, Vuorinen A, Hammar N, Becker W (2003) Comparison of nutrient intake data calculated on the basis of two different databases. Results and experiences from a Swedish-Finnish study. *Eur J Clin Nutr* 57: 1035–44.
17. Lakka HM, Laaksonen DE, Lakka TA, Niskanen LK, Kumpusalo E, et al. (2002) The metabolic syndrome and total and cardiovascular disease mortality in middle-aged men. *JAMA* 288: 2709–2716.
18. Lakka TA, Kauhanen J, Salonen JT (1996) Conditioning leisure time physical activity and cardiorespiratory fitness in sociodemographic groups of middle-aged men in eastern Finland. *Int J Epidemiol* 25: 86–93.
19. Ruff T, Nagel G, Altenburg HP, Miller AB, Thorand B (2005) Food and nutrient intake, anthropometric measurements and smoking according to alcohol consumption in the EPIC Heidelberg study. *Ann Nutr Metab* 49: 16–25.
20. Männistö S, Uusitalo K, Roos E, Fogelholm M, Pietinen P (1997) Alcohol beverage drinking, diet habits and body mass index in a cross-sectional survey. *Eur J Clin Nutr* 51: 326–332.
21. Tjønnelund A, Gronbaek M, Stripp C, Overvad K (1999) Wine intake and diet in a random sample of 48763 Danish men and women. *Am J Clin Nutr* 69: 49–54.
22. Ruidavets JB, Bataille V, Dallongeville J, Simon C, Bingham A, et al. (2004) Alcohol intake and diet in France, the prominent role of lifestyle. *Eur Heart J* 25: 1153–1162.
23. Park Y, Subar AF, Hollenbeck A, Schatzkin A (2011) Dietary Fiber Intake and Mortality in the NIH-AARP Diet and Health Study. *Arch Intern Med* 171: 1061–1068.
24. Pietinen P, Rimm EB, Korhonen P, Hartman AM, Willett WC, et al. (1996) Intake of dietary fiber and risk of coronary heart disease in a cohort of Finnish men. The Alpha-Tocopherol, Beta-Carotene Cancer Prevention Study. *Circulation* 94: 2720–2727.
25. Ilomäki J, Hajat A, Kauhanen J, Kurl S, Kaufman JS, et al. (2011) Relationship between alcohol consumption and myocardial infarction among ageing men using a marginal structural model. *Eur J Public Health*. Mar 11 [Epub ahead of print].
26. Kauhanen J, Kaplan GA, Goldberg DE, Salonen JT (1997) Beer bingeing and mortality: results from the Kuopio ischaemic heart disease risk factor study, a prospective population based study. *BMJ* 315: 846–851.
27. Matsui T, Yokoyama A, Matsushita S, Ogawa R, Mori S, et al. (2010) Effect of a comprehensive lifestyle modification program on the bone density of male heavy drinkers. *Alcohol Clin Exp Res* 34: 869–875.
28. Lips P (2001) Vitamin D deficiency and secondary hyperparathyroidism in the elderly: consequences for bone loss and fractures and therapeutic implications. *Endocr Rev* 22: 477–501.
29. Colditz GA, Giovannucci E, Rimm EB, Stampfer MJ, Rosner B, et al. (1991) Alcohol intake in relation to diet and obesity in women and men. *Am J Clin Nutr* 54: 49–55.
30. Piazza-Gardner AK, Barry AE (2012) Examining physical activity levels and alcohol consumption: are people who drink more active? *Am J Health Promot* 26: e95–e104.
31. Official Statistics of Finland: Employment [e-publication] 2010. Helsinki: Statistics Finland. Available: [http://www.stat.fi/til/tyokay/tau\\_en.html](http://www.stat.fi/til/tyokay/tau_en.html). (Accessed 15 May 2012).
32. Official Statistics of Finland: Households' consumption [e-publication] 2007. Helsinki: Statistics Finland. Available: [http://www.tilastokeskus.fi/til/ktutk/2006/ktutk\\_2006\\_2007-12-19\\_tie\\_001\\_en.html](http://www.tilastokeskus.fi/til/ktutk/2006/ktutk_2006_2007-12-19_tie_001_en.html). (Accessed 15 May 2012).
33. Österberg EL (2011) Alcohol tax changes and the use of alcohol in Europe. *Drug Alcohol Rev* 30: 124–129.
34. Fawehinmi TO, Voutilainen S, Ilomäki J, Kauhanen J (2011) Do dietary patterns differ in relation to the level of alcohol consumption? *Ann Nutr Metab* 58 Suppl 3: 135.
35. Kroke A, Klipstein-Grobusch K, Hoffmann K, Terbeck I, Boeing H, et al. (2001) Comparison of self-reported alcohol intake with the urinary excretion of 5-hydroxytryptophol:5-hydroxyindole-3-acetic acid, a biomarker of recent alcohol intake. *Br J Nutr* 85: 621–627.
36. Härkönen JT, Mäkelä P (2011) Age, period and cohort analysis of light and binge drinking in Finland, 1968–2008. *Alcohol Alcohol* 46: 349–356.
37. Osler M, Heitmann BL, Gerdes LU, Jørgensen LM, Schroll M (2001) Dietary patterns and mortality in Danish men and women: a prospective observational study. *Br J Nutr* 85: 219–225.
38. Piirtola M, Vahlberg T, Löppönen M, Rähä I, Isoaho R, et al. (2008) Fractures as predictors of excess mortality in the aged-a population-based study with a 12-year follow-up. *Eur J Epidemiol* 23: 747–55.
39. Jeeranun K, Duangporn K (2008) Dietary patterns for reducing cardiovascular disease risk among Thai alcohol drinkers. *Nutr Diet* 65: 272–278.
40. Rehm J, Room R, Monteiro M, Gmel G, Graham K, et al. (2003) Alcohol as a risk factor for global burden of disease. *Eur Addict Res* 9: 157–164.
41. Imhof A, Koenig W (2003) Alcohol inflammation and coronary heart disease. *Addict Biol* 8: 271–277.
42. Schröder H, Ferrández O, Conde JJ, Sánchez-Font A, Marrugat J (2005) Cardiovascular risk profile and type of alcohol beverage consumption: a population-based study. *Ann Nutr Metab* 49: 100–106.
43. Official Statistics of Finland (2011). Causes of death 2010 [e-publication]. Helsinki: Statistics Finland. Available: [http://www.stat.fi/til/ksyyt/index\\_en.html](http://www.stat.fi/til/ksyyt/index_en.html). (Accessed 15 May 2012).
44. Menotti A, Kromhout D, Blackburn H, Fidanza F, Buzina R, et al. (1999) Food intake patterns and 25-year mortality from coronary heart disease: cross-cultural correlations in the Seven Countries Study. The Seven Countries Study Research Group. *Eur J Epidemiol* 15: 507–515.
45. Rimm EB, Williams P, Fosher K, Criqui M, Stampfer MJ (1999) Moderate alcohol intake and lower risk of coronary heart disease: meta-analysis of effects on lipids and haemostatic factors. *Br Med J* 319: 1523–1528.
46. Mezzano D, Leighton F, Martínez C, Marshall G, Cuevas A, et al. (2001) Complementary effects of Mediterranean diet and moderate red wine intake on haemostatic cardiovascular risk factors. *Eur J Clin Nutr* 55: 444–451.
47. Gronbaek M, Becker U, Johansen D, Gottschau A, Schnohr P, et al. (2000) Type of alcohol consumed and mortality from all causes, coronary heart disease, and cancer. *Ann Intern Med* 133: 411–419.
48. Thun MJ, Peto R, Lopez AD, Monaco JH, Henley SJ, et al. (1997) Alcohol consumption and mortality among middle-aged and elderly U.S. Adults. *N Engl J Med* 337: 1705–1714.
49. Berger K, Ajani UA, Kase CS, Gaziano JM, Buring JE, et al. (1999) Light-to-moderate alcohol consumption and the risk of stroke among U.S. male physicians. *N Engl J Med* 341: 1557–1564.
50. Panagiotakos D, Bountziouka V, Zimbeakis A, Vlachou I, Polychronopoulos E (2007) Food pattern analysis and prevalence of cardiovascular disease risk factors among elderly people from Mediterranean islands. *J Med Food* 10: 615–621.
